# Supplementary material for: Genetic Causes of Phenotypic Adaptation to the Second Fermentation of Sparkling Wines in Saccharomyces cerevisiae
Source: PubMed Central journal article supplement (PMC5295589; doi:10.1534/g3.116.037283), 2016-11-28

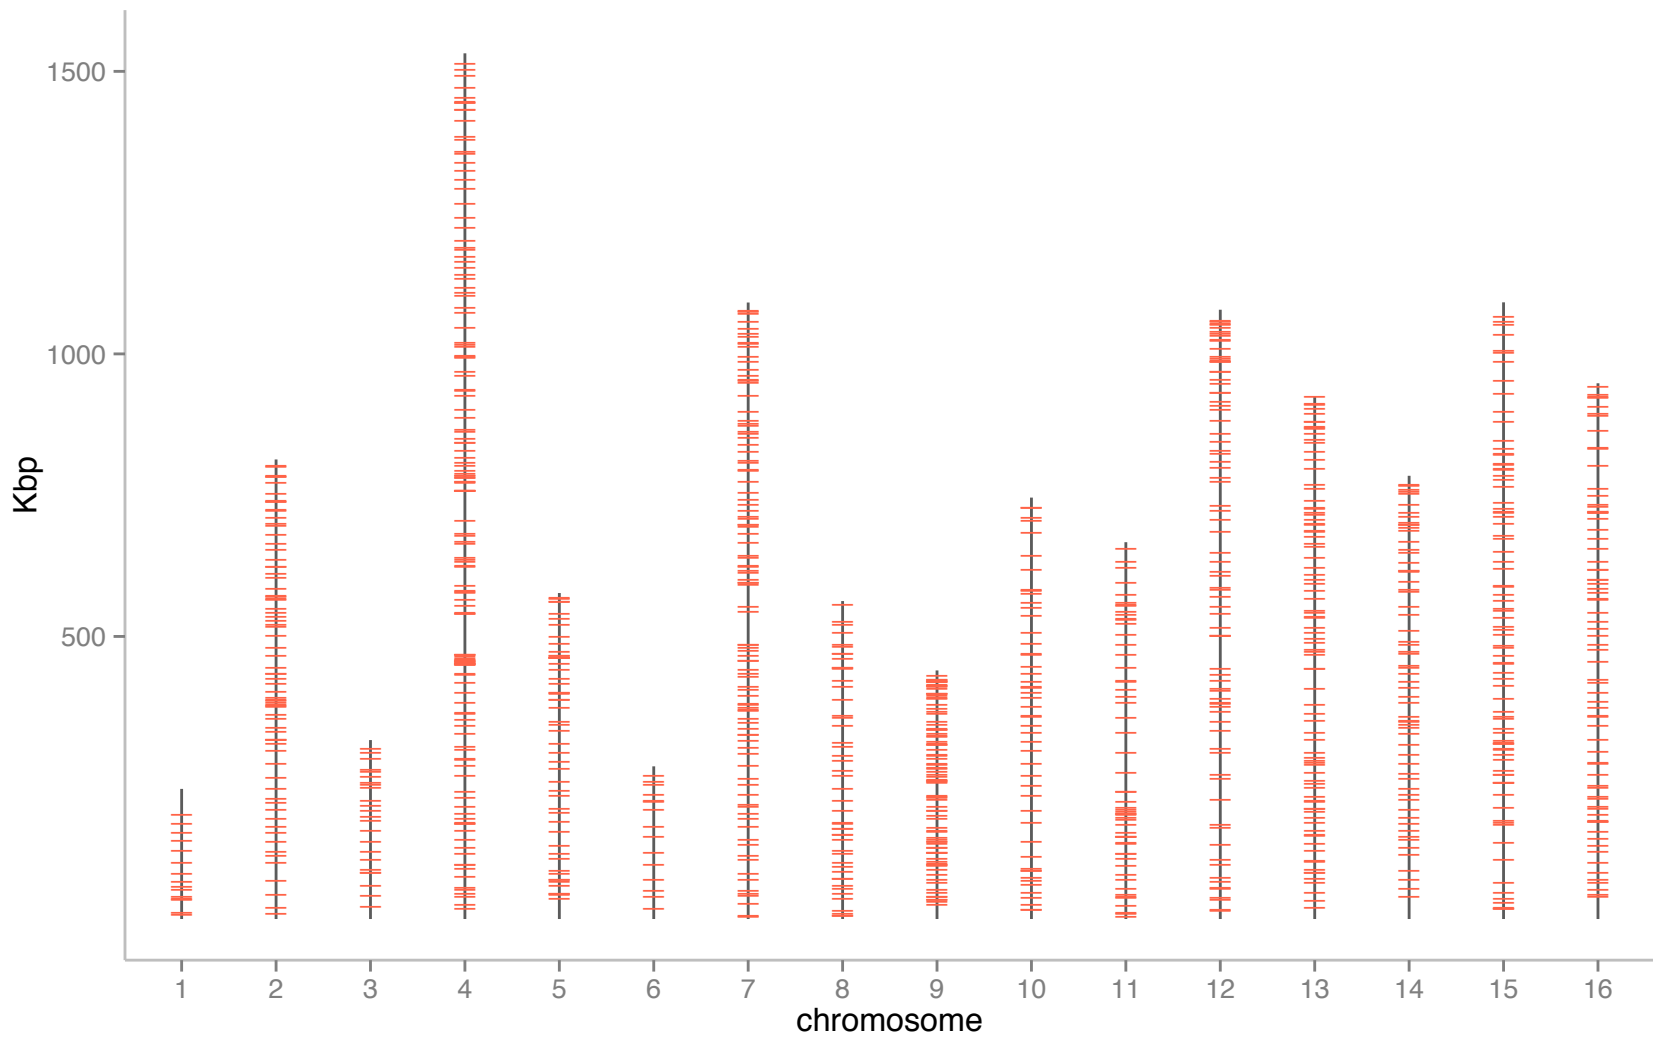

Supplement: 399FigureS1.pdf [file 399FigureS1.pdf]
